# Supplementary material
Source: MDPI journal article supplement (https://www.mdpi.com/2073-4352/12/6/773)
Supplement: s1 [file s1]

# Weak Antilocalization in Polycrystalline SnTe Films Deposited by Magnetron Sputtering

Xiaodong Li <sup>1</sup>, Yang Yang <sup>1</sup>, Xiaocui Wang <sup>2,3</sup>, Peng Zhu <sup>2</sup>, Fanming Qu <sup>3</sup>, Zhiwei Wang <sup>2</sup> and Fan Yang <sup>1,\*</sup>

<sup>1</sup> Center for Joint Quantum Studies and Department of Physics, School of Science, Tianjin University, Tianjin 300350, China; xiaodongli@tju.edu.cn (X.L.); yangyang2020@tju.edu.cn (Y.Y.)

<sup>2</sup> Centre for Quantum Physics, Key Laboratory of Advanced Optoelectronic Quantum Architecture and Measurement (MOE), School of Physics, Beijing Institute of Technology, Beijing 100081, China; wangxc\_12@iphy.ac.cn (X.W.); zhupeng45@163.com (P.Z.); zhiweiwang@bit.edu.cn (Z.W.)

<sup>3</sup> Beijing National Laboratory for Condensed Matter Physics, Institute of Physics, Chinese Academy of Sciences, Beijing 100190, China; fanmingqu@iphy.ac.cn

\* Correspondence: fanyangphys@tju.edu.cn

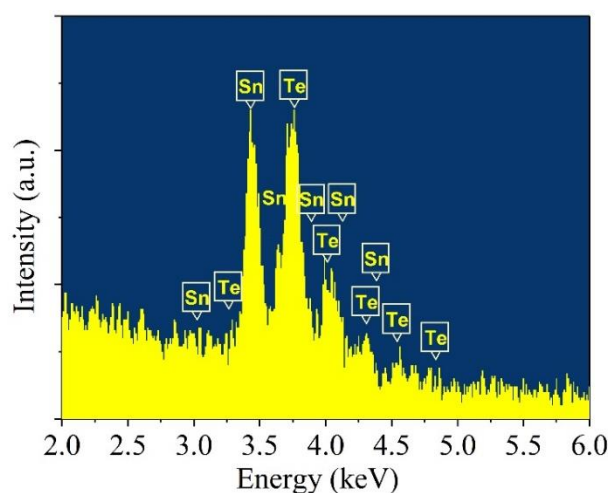

**Figure S1.** Energy dispersive X-ray spectrum of the as-deposited SnTe film. The atomic ratio of Sn:Te is measured to be 51.6: 48.4.

**Citation:** Li, X.; Yang, Y.; Wang, X.; Zhu, P.; Qu, F.; Wang, Z.; Yang, F. Weak Antilocalization in Polycrystalline SnTe Films Deposited by Magnetron Sputtering. *Crystals* **2022**, *12*, 773. <https://doi.org/10.3390/cryst12060773>

Academic Editors: Simona Binetti and Artem Pronin

Received: 3 May 2022

Accepted: 24 May 2022

Published: 26 May 2022

**Publisher's Note:** MDPI stays neutral with regard to jurisdictional claims in published maps and institutional affiliations.

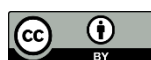

**Copyright:** © 2022 by the authors. Licensee MDPI, Basel, Switzerland. This article is an open access article distributed under the terms and conditions of the Creative Commons Attribution (CC BY) license (<https://creativecommons.org/licenses/by/4.0/>).

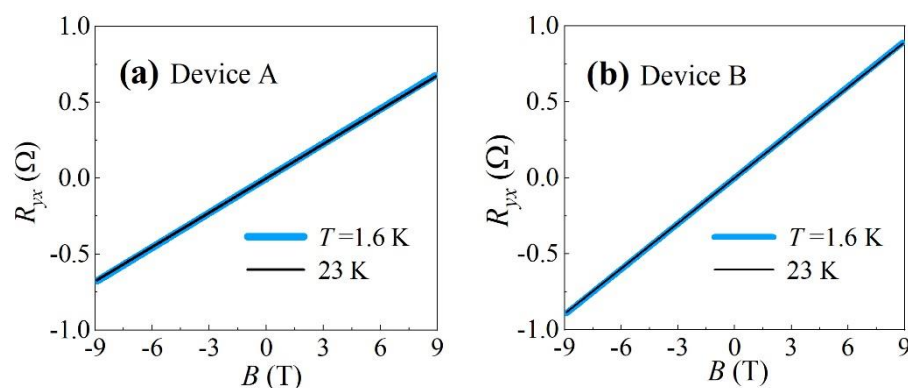

**Figure S2.** (a) Hall resistance of device A, measured at  $T = 1.6\text{K}$  and  $23\text{K}$ . (b) Hall resistance of device B, measured at  $T = 1.6\text{K}$  and  $23\text{K}$ .

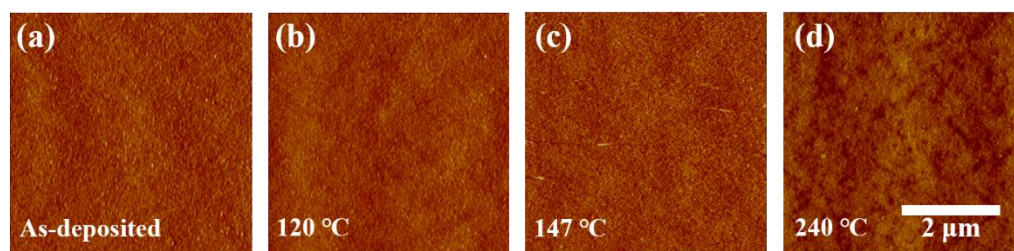

**Figure S3.** (a-d) AFM images of SnTe films annealed at various temperatures. The scanning area is  $5 \times 5 \mu\text{m}^2$ .
